# Supplementary material for: Self-healing hydrophobic POSS-functionalized fluorinated copolymers via RAFT polymerization and dynamic Diels–Alder reaction
Source: Royal Society of Chemistry journal article supplement (doi:10.1039/d0py01522a), 2020-12-28
Supplement: d0py01522a1.pdf [file d0py01522a1.pdf]

## Self-Healing Hydrophobic POSS-functionalized Fluorinated Copolymers via RAFT Polymerization and dynamic Diels-Alder Reaction

Siva Ponnupandian<sup>a,b</sup>, Prantik Mondal<sup>a</sup>, Thomas Becker<sup>b</sup>, Richard Hoogenboom<sup>c</sup>, Andrew B. Lowe<sup>b</sup>, Nikhil K. Singha<sup>a,\*</sup>

<sup>a</sup> Rubber Technology Centre, Indian Institute of Technology Kharagpur, Kharagpur - 721302, West Bengal, India.

<sup>b</sup> Curtin Institute for Functional Molecules and Interfaces and School of Molecular and Life Sciences, Curtin University, Kent Street, Bentley, WA 6102, Australia

<sup>c</sup> Supramolecular Chemistry Group, Center of Macromolecular Chemistry (CMaC), Department of Organic and Macromolecular Chemistry, Ghent University, Belgium

\*Corresponding Author: E-mail: nks@rtc.iitkgp.ac.in (N. K. Singha) Tel: + 91-3222-283178, Fax: + 91-3222-255303

### Supporting information

#### Analytical Methods

The prepared samples were characterized using a Fourier transform infrared spectrophotometer (FTIR) (Perkin Elmer, model spectrum-2) over 400 cm<sup>-1</sup> - 4000 cm<sup>-1</sup>. At ambient temperature, using CDCl<sub>3</sub> as NMR solvent, the <sup>1</sup>H-NMR spectroscopy of all the polymer samples were recorded on a Bruker 600 MHz nuclear magnetic resonance spectroscopy (NMR) instrument. Tetramethylsilane (TMS) was used as an internal standard. The molecular weights ( $M_n$ ) and the dispersity ( $\mathcal{D}$ ) of the copolymers were determined by size exclusion chromatography (SEC) using a Viscotek SEC instrument equipped with two ViscoGel mix bed columns (17360-GMHHRM) connected in series with a RI detector. THF was used as the eluent at a flow rate of 1 mL min<sup>-1</sup>. Narrow molecular weight distribution polystyrene and poly (methyl methacrylate) standards were used to calibrate the instrument. The Differential scanning calorimetry (DSC) analysis was carried out under a nitrogen atmosphere using a TA Instrument (Discovery DSC 25) at a heating rate of 10 °C min<sup>-1</sup> within a temperature range of -30°C to +200°C. For the DSC analysis, 5-6 mg of samples were taken in the Tzero aluminium pan. Initially, the polymer sample in the pan was quenched to liquid nitrogen temperature and then heated to +200°C at a heating rate of 10°C/min. After 1 min of equilibration time at a cooling rate of 10°C/min, the sample was again cooled to -30°C, followed by reheating to +200°C at the heating rate of 10°C/min. The inflexion point in the second heating scan is taken as the glass transition temperature ( $T_g$ ). Thermogravimetric analysis (TGA) (of 5-6 mg individual polymer samples) was carried out on a Shimadzu Instrument at a heating rate of 20°C/min within the temperature range of 30°C to 600°C under a nitrogen atmosphere. Surface topographies of copolymers (prepared via drop-casting 50 mg/mL polymer solution in THF on a glass slide) were studied using atomic force microscopy (AFM) (Agilent 5500 (USA) instrument) operated at room temperature (r.t.) in air. Water contact angles (WCA) were measured on a CA Goniometer (Rame-Hart instrument co., USA Model no. 260F4). A water-drop (about 0.5 µL) was placed on the polymer surface (prepared via drop-casting 50 mg/mL polymer solution in THF on a glass slide) to measure the static contact angle using the DROP image Advanced CA software. Self-healing analysis of scratched polymer samples (prepared via drop-casting 50 mg/mL polymer solution in THF on a glass slide) was monitored under an optical microscope (Leica DMLM, made in Germany). Herein, the thickness of the

(drop-cast) polymer film (50 mg/mL in THF solvent) was maintained within the range of 0.1-0.2 mm.

### Molar composition calculation

The molar composition of the copolymer was determined from the  $^1\text{H}$  NMR spectrum of the copolymer using the following formula.

$$\text{Composition of FMA } (M_{FMA})(\%) = \frac{M_{FMA}/2}{M_{FMA}/2 + M_{TFEMA}/2} \times 100$$

**(Equation S1)**

Where,

$M_{FMA}$  = integral area of the  $\text{H}^5$  protons;  $M_{TFEMA}$  = integral area of the  $\text{H}^{11}$  protons.

### Theoretical molecular weight calculation

The theoretical molecular weight of DA copolymers was calculated using the following formula:

$$M_n(P1) + (Z \times \text{Molecular weight of POSS} - M) \quad \text{(Equation S2)}$$

Where,

Z is the molar ratio of POSS-M incorporated while DA modification of **P1** copolymer.

### Degree of Polymerization (DP) calculation using NMR analysis

The degree of polymerization (DP) of FMA and TFEMA within the **P1** copolymer and the **P1C** modified copolymer was calculated using the integral area of  $-\text{CH}_2$  protons of FMA ( $\text{H}^5$ ) and TFEMA ( $\text{H}^{11}$ ) w.r.t the  $-\text{CH}_2$  proton of the RAFT end group ( $\text{H}^2$ ) using the following equation.

$$DP \text{ of FMA} = [(I_5/2)/(I_2/2)]$$

$$DP \text{ of TFEMA} = [(I_{11}/2)/(I_2/2)] \quad \text{(Equation S3)}$$

Where,

$I_5$  = integral area of the  $\text{H}^5$  protons;  $I_{11}$  = integral area of the  $\text{H}^{11}$  protons;  $I_2$  = integral area of the  $\text{H}^2$  protons.

## Healing efficiency ( $E_H$ ) calculation

The self-healing efficiency of the copolymers were determined from the following equation.

$$\text{Healing efficiency } (E_H)(\%) = \frac{(\text{Original scratch width}) - (\text{Healed scratch width})}{(\text{Original scratch width})} \times 100$$

(Equation S4)

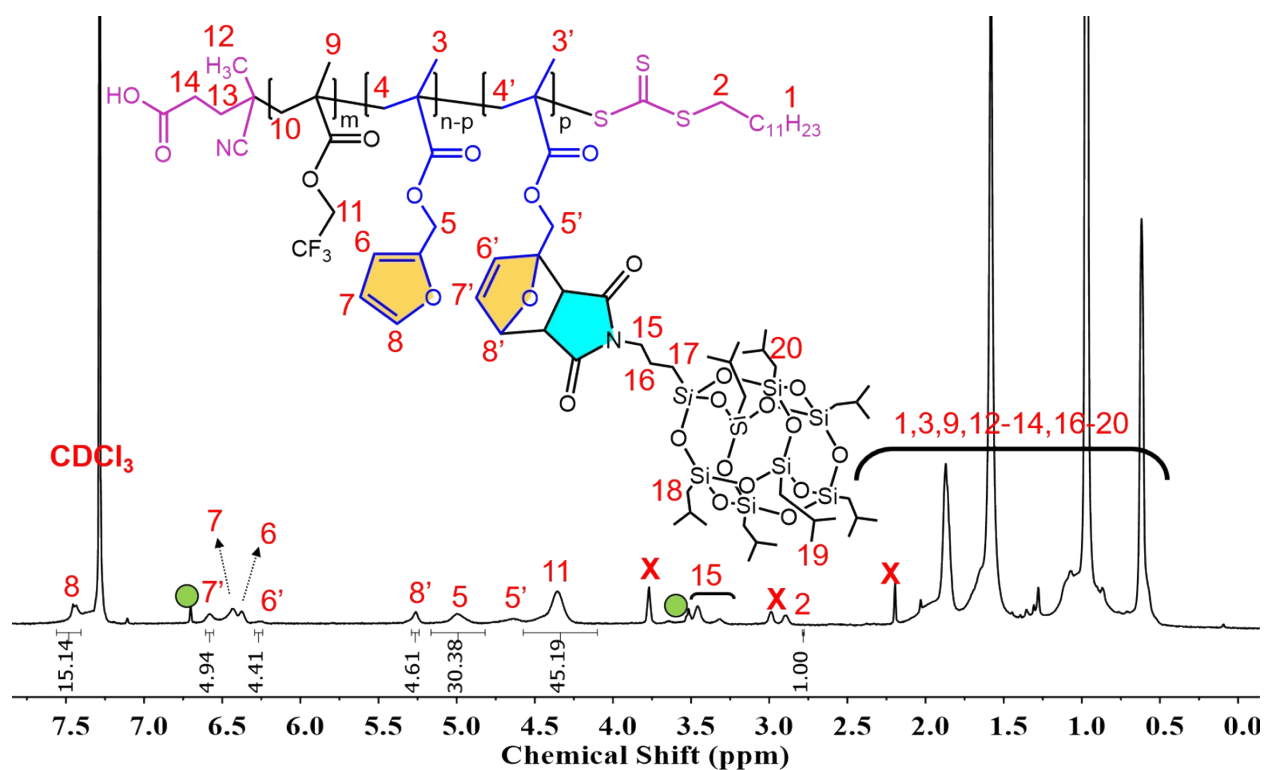

Figure S1.  $^1\text{H}$  NMR spectrum of P1A.

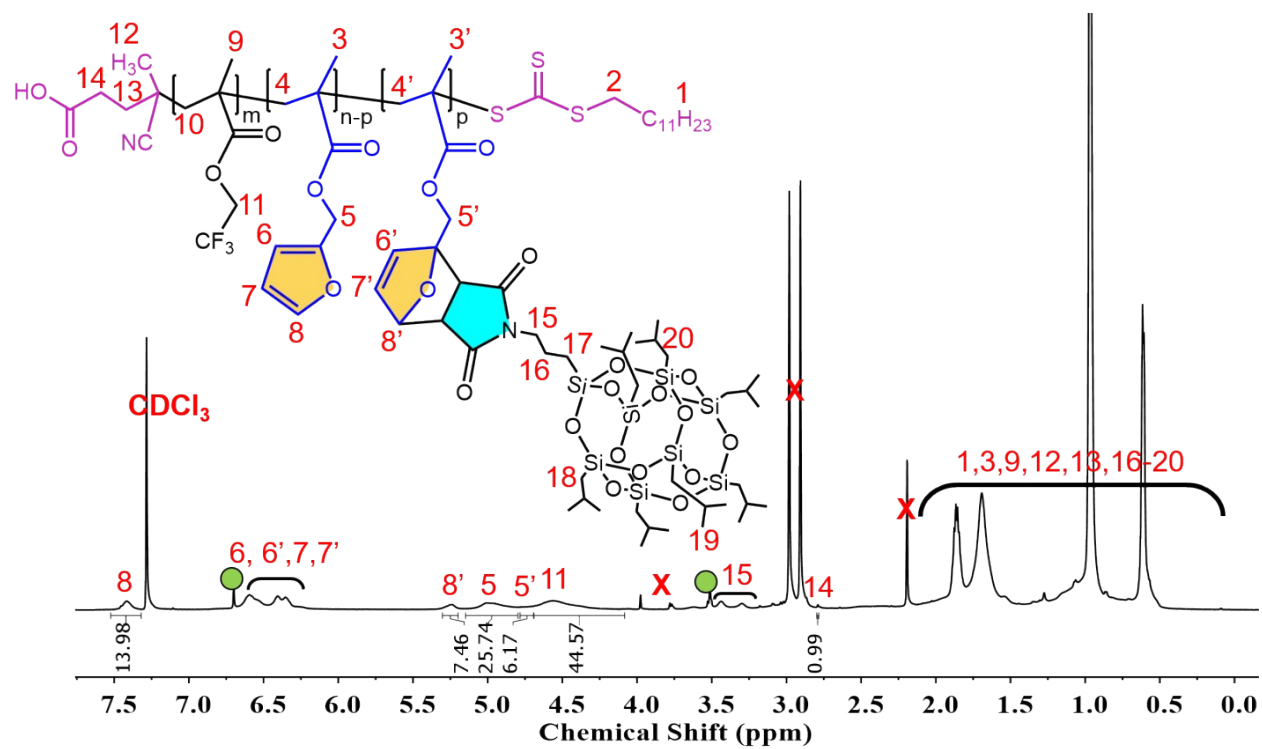

Figure S2. <sup>1</sup>H NMR spectrum of P1B.

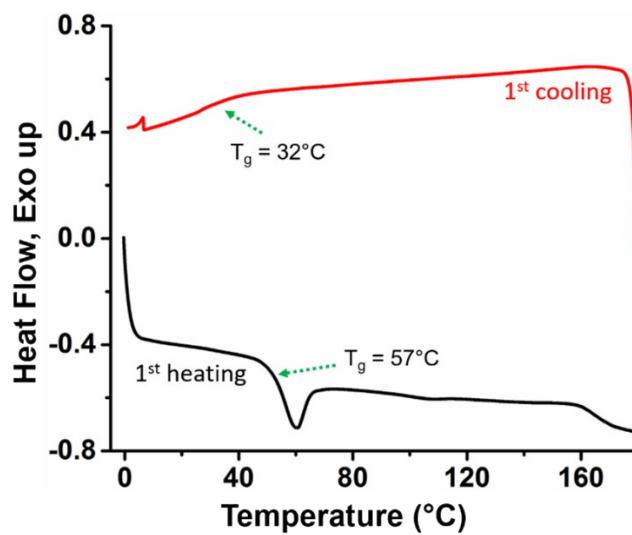

Figure S3. DSC thermogram of P1 copolymer

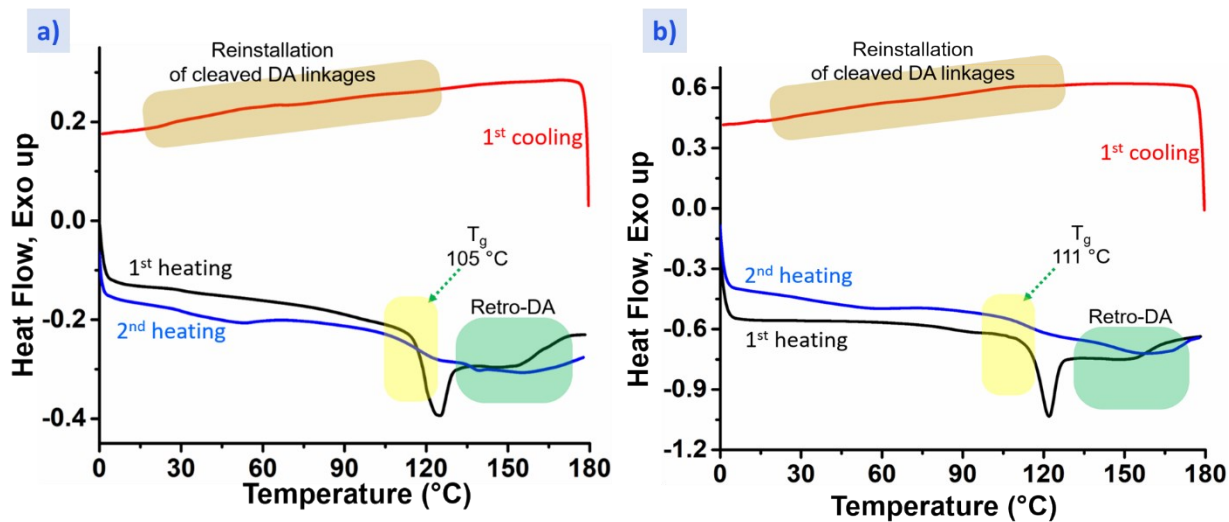

**Figure S4.** DSC analysis of P1A and P1B POSS-M modified polymer

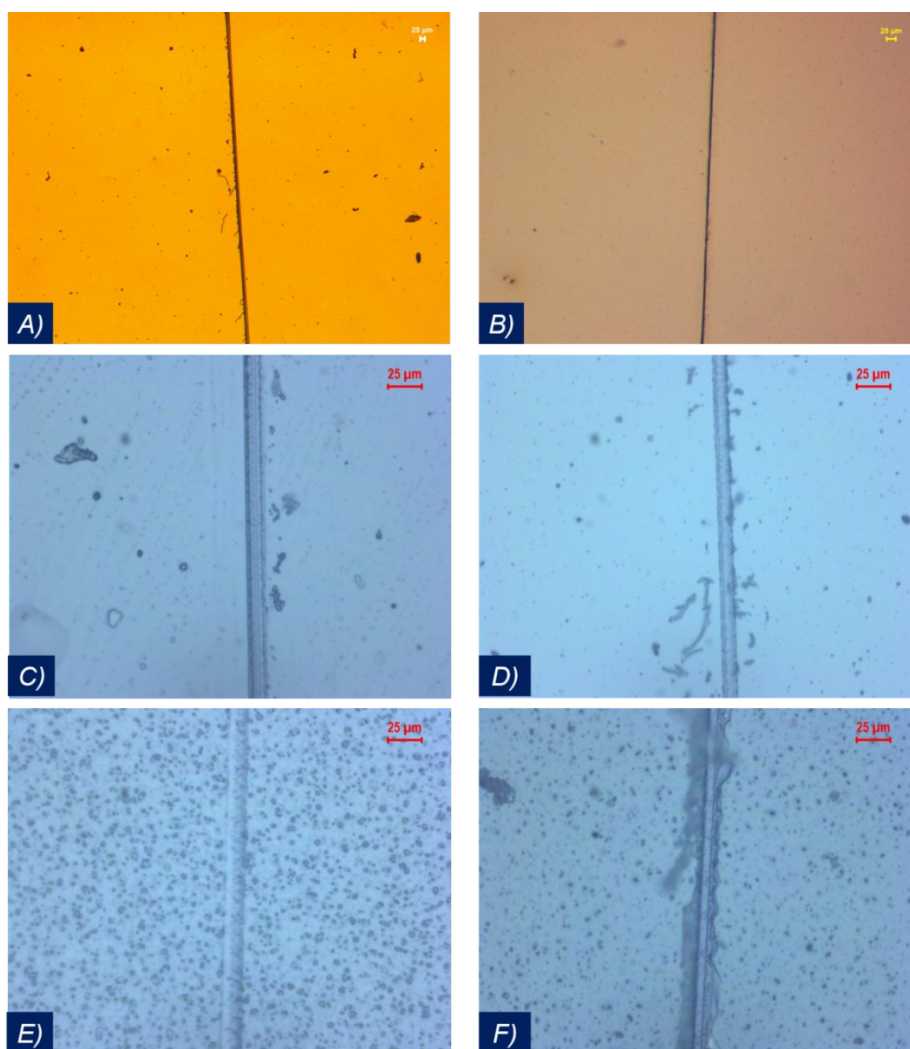

**Figure S5.** Optical microscopy images of scratched and healed samples of P1 (A-B) (unmodified copolymer), and P1A (C-D), P1B (E-F) (POSS-M modified copolymer)
